# Supplementary figures and images for: Quercetin-coated Fe3O4 nanoparticle sensors based on low-field NMR for determination and removal of Pb2+ and Cu2+ in biological samples
Source: Royal Society of Chemistry journal article supplement (doi:10.1039/c8ay00598b), 2018-01-01

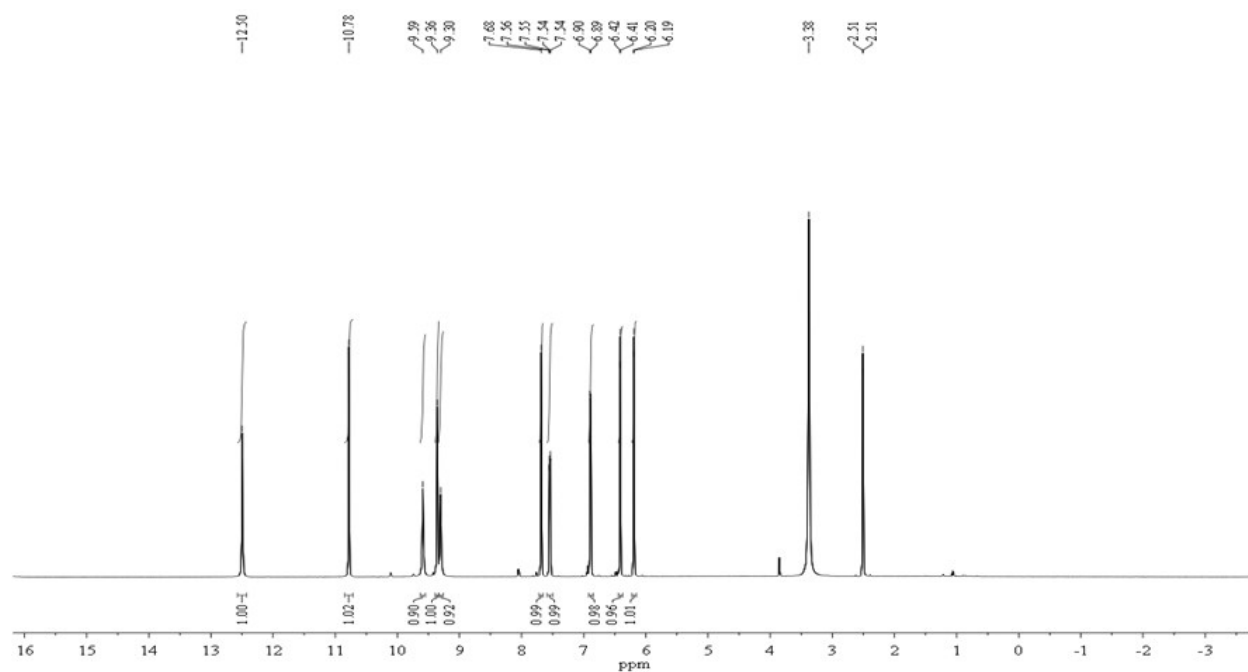

Fig. S1

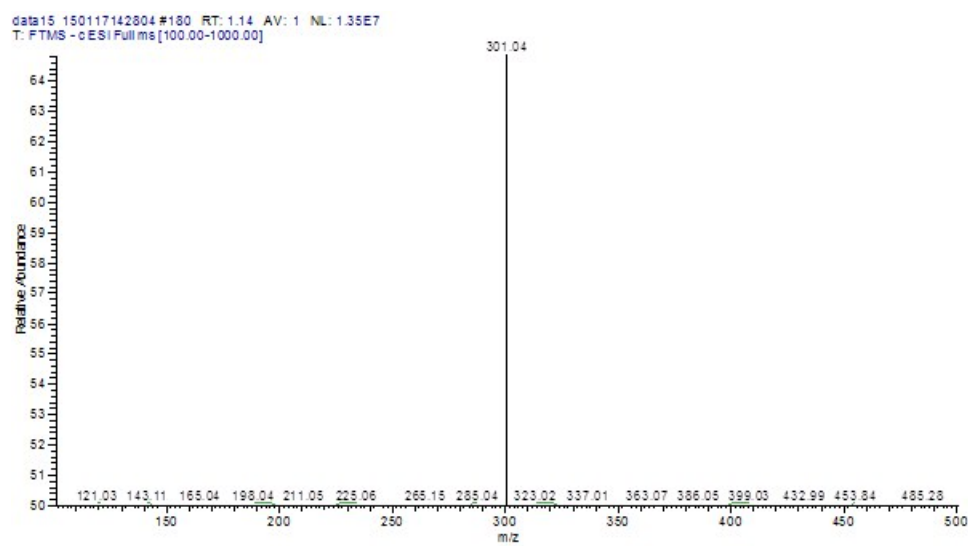

Fig. S2

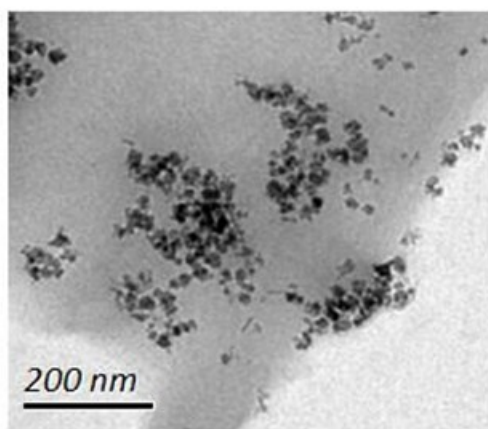

(a)

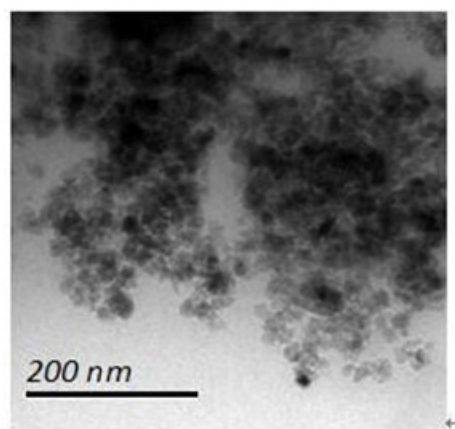

(b)

Fig. S3

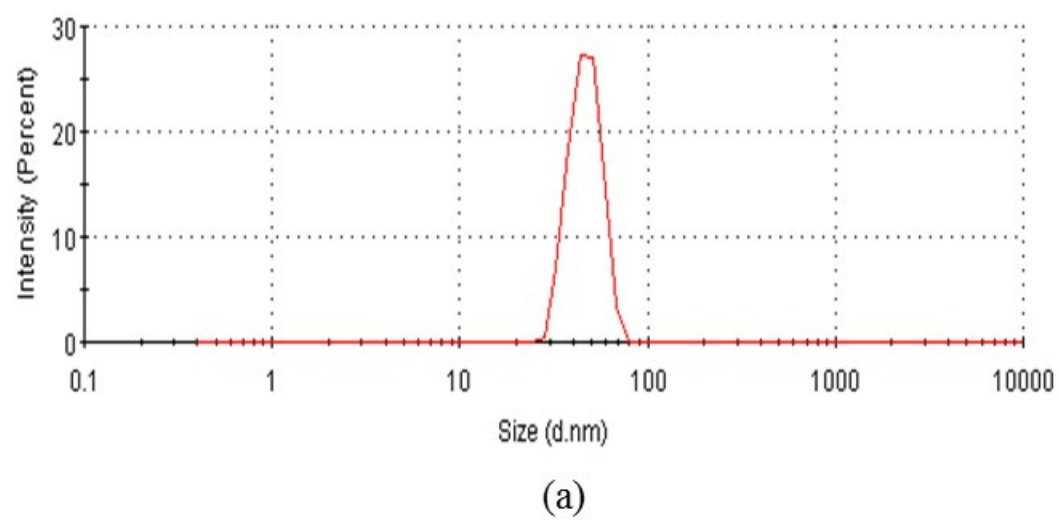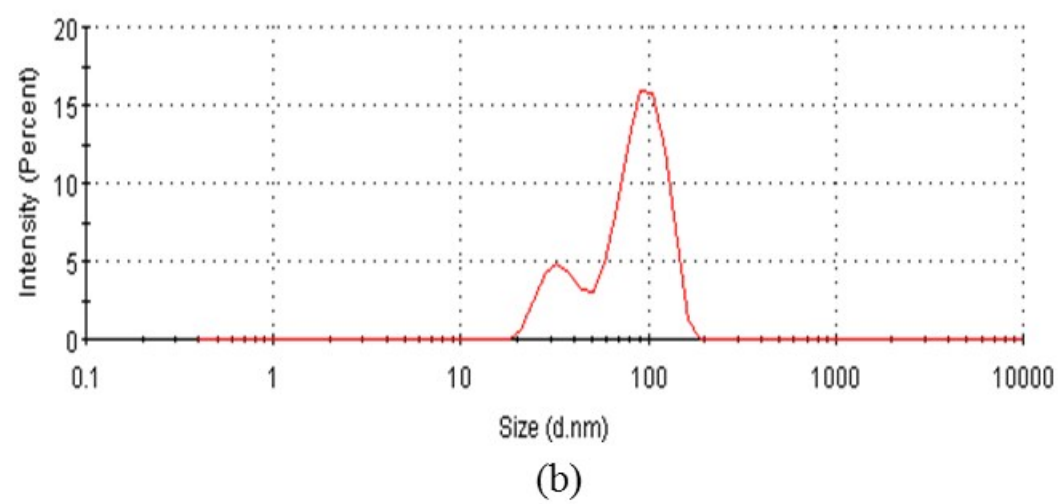

Fig. S4

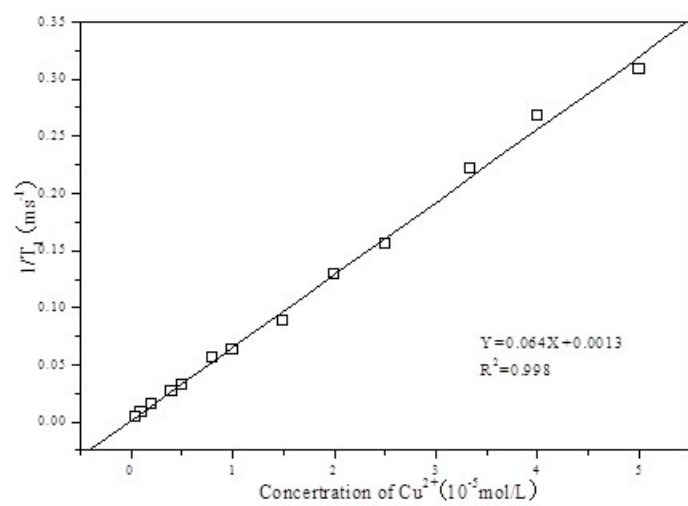

Fig. S5

Supplement: c8ay00598b1.pdf [file c8ay00598b1.pdf]
